# Supplementary material
Source: publisher figshare collection journal article supplement (https://gsajournals.figshare.com/articles/dataset/_/14488854)
Supplement: Supplementary file 2 [file 1]

**Supplemental Table S1.** Recursion equations to simulate random mating.

| genotype                                                     | frequency | frequency after random mating                                                                                                                                                                                                                                                                                                                                             |
|--------------------------------------------------------------|-----------|---------------------------------------------------------------------------------------------------------------------------------------------------------------------------------------------------------------------------------------------------------------------------------------------------------------------------------------------------------------------------|
| X/X; III/III; IV/IV                                          | $f_1$     | $ \begin{aligned} & f_1 m_1/2 + f_1 m_3/2 + f_1 m_4/4 \\ & + f_2 m_1/4 + f_2 m_3/4 + f_2 m_4/8 \\ & + f_3 m_1/4 + f_3 m_3/8 + f_3 m_4/16 \\ & + f_5 m_1/8 + f_5 m_3/8 + f_5 m_4/16 \\ & + f_6 m_1/16 + f_6 m_3/16 + f_6 m_4/32 \end{aligned} $                                                                                                                            |
| X/X; III/III; IV/IV <sup>F</sup>                             | $f_2$     | $ \begin{aligned} & f_2 m_1/4 + f_2 m_3/4 + f_2 m_4/8 \\ & + f_3 m_1/8 + f_3 m_3/8 + f_3 m_4/16 \\ & + f_5 m_1/8 + f_5 m_3/8 + f_5 m_4/16 \\ & + f_6 m_1/16 + f_6 m_3/16 + f_6 m_4/32 \end{aligned} $                                                                                                                                                                     |
| X/X; III/III <sup>M</sup> ; IV/IV <sup>F</sup>               | $f_3$     | $ \begin{aligned} & f_2 m_1/4 + f_2 m_2/2 + f_2 m_4/8 + f_2 m_5/4 \\ & + f_3 m_1/4 + f_3 m_2/4 + f_3 m_3/8 \\ & + f_3 m_4/8 + f_3 m_5/8 \\ & + f_4 m_1/4 + f_4 m_3/4 + f_4 m_4/8 \\ & + f_5 m_1/8 + f_5 m_2/4 + f_5 m_4/16 + f_5 m_5/8 \\ & + f_6 m_1/8 + f_6 m_2/8 + f_6 m_3/16 \\ & + f_6 m_4/16 + f_6 m_5/16 \\ & + f_7 m_1/8 + f_7 m_3/8 + f_7 m_4/16 \end{aligned} $ |
| X/X; III <sup>M</sup> /III <sup>M</sup> ; IV/IV <sup>F</sup> | $f_4$     | $ \begin{aligned} & f_3 m_1/8 + f_3 m_2/4 + f_3 m_4/16 + f_3 m_5/8 \\ & + f_4 m_1/4 + f_4 m_2/2 + f_4 m_4/8 + f_4 m_5/4 \\ & + f_6 m_1/16 + f_6 m_2/8 + f_6 m_4/32 + f_6 m_5/16 \\ & + f_7 m_1/8 + f_7 m_2/4 + f_7 m_4/16 + f_7 m_5/8 \end{aligned} $                                                                                                                     |
| X/Y <sup>M</sup> ; III/III; IV/IV <sup>F</sup>               | $f_5$     | $ \begin{aligned} & f_2 m_3/4 + f_2 m_4/8 + f_2 m_6/2 + f_2 m_7/4 \\ & + f_3 m_3/8 + f_3 m_4/16 + f_3 m_6/4 + f_3 m_7/8 \\ & + f_5 m_1/8 + f_5 m_3/4 + f_5 m_4/8 \\ & + f_5 m_6/4 + f_5 m_7/8 \\ & + f_6 m_1/16 + f_6 m_3/8 + f_6 m_4/16 \\ & + f_6 m_6/8 + f_6 m_7/16 \\ & + f_8 m_1/4 + f_8 m_3/4 + f_8 m_4/8 \\ & + f_9 m_1/8 + f_9 m_3/8 + f_9 m_4/16 \end{aligned} $ |

|                               |       |                                                                                                                                                                                                                                                                                                                                                                                                                                                                                                                                                                                                                            |
|-------------------------------|-------|----------------------------------------------------------------------------------------------------------------------------------------------------------------------------------------------------------------------------------------------------------------------------------------------------------------------------------------------------------------------------------------------------------------------------------------------------------------------------------------------------------------------------------------------------------------------------------------------------------------------------|
| $X/Y^M, III/III^M, IV/IV^F$   | $f_6$ | $ \begin{aligned} & f_2m_4/8 + f_2m_5/4 + f_2m_7/4 + f_2m_8/2 \\ & + f_3m_3/8 + f_3m_4/8 + f_3m_5/8 \\ & + f_3m_6/4 + f_3m_7/4 + f_3m_8/4 \\ & + f_4m_3/4 + f_4m_4/8 + f_4m_6/2 + f_4m_7/4 \\ & + f_5m_1/8 + f_5m_2/4 + f_5m_4/8 \\ & + f_5m_5/4 + f_5m_7/8 + f_5m_8/4 \\ & + f_6m_1/8 + f_6m_2/8 + f_6m_3/8 + f_6m_4/8 \\ & + f_6m_5/8 + f_6m_6/8 + f_6m_7/8 + f_6m_8/8 \\ & + f_7m_1/8 + f_7m_3/4 + f_7m_4/8 \\ & + f_7m_6/4 + f_7m_7/8 \\ & + f_8m_1/4 + f_8m_2/2 + f_8m_4/8 + f_8m_5/4 \\ & + f_9m_1/4 + f_9m_2/4 + f_9m_3/8 \\ & + f_9m_4/8 + f_9m_5/8 \\ & + f_{10}m_1/4 + f_{10}m_3/4 + f_{10}m_4/8 \end{aligned} $ |
| $X/Y^M, III^M/III^M, IV/IV^F$ | $f_7$ | $ \begin{aligned} & f_3m_4/16 + f_3m_5/8 + f_3m_7/8 + f_3m_8/4 \\ & + f_4m_4/8 + f_4m_5/4 + f_4m_7/4 + f_4m_8/2 \\ & + f_6m_1/16 + f_6m_2/8 + f_6m_4/16 \\ & + f_6m_5/8 + f_6m_7/16 + f_6m_8/8 \\ & + f_7m_1/8 + f_7m_2/4 + f_7m_4/8 \\ & + f_7m_5/4 + f_7m_7/8 + f_7m_8/4 \\ & + f_9m_1/8 + f_9m_2/4 + f_9m_4/16 + f_9m_5/8 \\ & + f_{10}m_1/4 + f_{10}m_2/2 + f_{10}m_4/8 + f_{10}m_5/4 \end{aligned} $                                                                                                                                                                                                                  |
| $Y^M/Y^M, III/III; IV/IV^F$   | $f_8$ | $ \begin{aligned} & f_5m_3/8 + f_5m_4/16 + f_5m_6/4 + f_5m_7/8 \\ & + f_6m_3/16 + f_6m_4/32 + f_6m_6/8 + f_6m_7/16 \\ & + f_8m_3/4 + f_8m_4/8 + f_8m_6/2 + f_8m_7/4 \\ & + f_9m_3/8 + f_9m_4/16 + f_9m_6/4 + f_9m_7/8 \end{aligned} $                                                                                                                                                                                                                                                                                                                                                                                      |
| $Y^M/Y^M, III/III^M, IV/IV^F$ | $f_9$ | $ \begin{aligned} & f_5m_4/16 + f_5m_5/8 + f_5m_7/8 + f_5m_8/4 \\ & + f_6m_3/16 + f_6m_4/16 + f_6m_5/16 \\ & + f_6m_6/8 + f_6m_7/8 + f_6m_8/8 \\ & + f_7m_3/8 + f_7m_4/16 + f_7m_6/4 + f_7m_7/8 \\ & + f_8m_4/8 + f_8m_5/4 + f_8m_7/4 + f_8m_8/2 \\ & + f_9m_3/8 + f_9m_4/8 + f_9m_5/8 \\ & + f_9m_6/4 + f_9m_7/4 + f_9m_8/4 \\ & + f_{10}m_3/4 + f_{10}m_4/8 + f_{10}m_6/2 + f_{10}m_7/4 \end{aligned} $                                                                                                                                                                                                                  |

|                                 |          |                                                                                                                                                                                                                                                                                                                                                                                                                                                                                                                                                                                                                         |
|---------------------------------|----------|-------------------------------------------------------------------------------------------------------------------------------------------------------------------------------------------------------------------------------------------------------------------------------------------------------------------------------------------------------------------------------------------------------------------------------------------------------------------------------------------------------------------------------------------------------------------------------------------------------------------------|
| $Y^M/Y^M; III^M/III^M; IV/IV^F$ | $f_{10}$ | $ \begin{aligned} & f_6 m_4/32 + f_6 m_5/16 + f_6 m_7/16 + f_6 m_8/8 \\ & + f_7 m_4/16 + f_7 m_5/8 + f_7 m_7/8 + f_7 m_8/4 \\ & + f_9 m_4/16 + f_9 m_5/8 + f_9 m_7/8 + f_9 m_8/4 \\ & + f_{10} m_4/8 + f_{10} m_5/4 + f_{10} m_7/4 + f_{10} m_8/2 \end{aligned} $                                                                                                                                                                                                                                                                                                                                                       |
| $X/X; III/III^M; IV/IV$         | $m_1$    | $ \begin{aligned} & f_1 m_1/2 + f_1 m_2/1 + f_1 m_4/4 + f_1 m_5/2 \\ & + f_2 m_1/4 + f_2 m_2/2 + f_2 m_4/8 + f_2 m_5/4 \\ & + f_3 m_1/8 + f_3 m_2/4 + f_3 m_3/8 \\ & + f_3 m_4/8 + f_3 m_5/8 \\ & + f_4 m_1/4 + f_4 m_3/4 + f_4 m_4/8 \\ & + f_5 m_1/8 + f_5 m_2/4 + f_5 m_4/16 + f_5 m_5/8 \\ & + f_6 m_1/8 + f_6 m_2/8 + f_6 m_3/16 \\ & + f_6 m_4/16 + f_6 m_5/16 \\ & + f_7 m_1/8 + f_7 m_3/8 + f_7 m_4/16 \end{aligned} $                                                                                                                                                                                          |
| $X/X; III^M/III^M; IV/IV$       | $m_2$    | $ \begin{aligned} & f_3 m_1/8 + f_3 m_2/4 + f_3 m_4/16 + f_3 m_5/8 \\ & + f_4 m_1/4 + f_4 m_2/2 + f_4 m_4/8 + f_4 m_5/4 \\ & + f_6 m_1/16 + f_6 m_2/8 + f_6 m_4/32 + f_6 m_5/16 \\ & + f_7 m_1/8 + f_7 m_2/4 + f_7 m_4/16 + f_7 m_5/8 \end{aligned} $                                                                                                                                                                                                                                                                                                                                                                   |
| $X/Y^M; III/III; IV/IV$         | $m_3$    | $ \begin{aligned} & f_1 m_3/2 + f_1 m_4/4 + f_1 m_6/1 + f_1 m_7/2 \\ & + f_2 m_3/4 + f_2 m_4/8 + f_2 m_6/2 + f_2 m_7/4 \\ & + f_3 m_3/8 + f_3 m_4/16 + f_3 m_6/4 + f_3 m_7/8 \\ & + f_5 m_1/8 + f_5 m_3/4 + f_5 m_4/8 \\ & + f_5 m_6/4 + f_5 m_7/8 \\ & + f_6 m_1/16 + f_6 m_3/8 + f_6 m_4/16 \\ & + f_6 m_6/8 + f_6 m_7/16 \\ & + f_8 m_1/4 + f_8 m_3/4 + f_8 m_4/8 \\ & + f_9 m_1/8 + f_9 m_3/8 + f_9 m_4/16 \\ & + f_5 m_6/4 + f_5 m_7/8 \\ & + f_6 m_1/16 + f_6 m_3/8 + f_6 m_4/16 \\ & + f_6 m_6/8 + f_6 m_7/16 \\ & + f_8 m_1/4 + f_8 m_3/4 + f_8 m_4/8 \\ & + f_9 m_1/8 + f_9 m_3/8 + f_9 m_4/16 \end{aligned} $ |

$X/Y^M; III/III^M; IV/IV$

$m_4$

$$\begin{aligned}
& f_1 m_4/4 + f_1 m_5/2 + f_1 m_7/2 + f_1 m_8/1 \\
& + f_2 m_4/8 + f_2 m_5/4 + f_2 m_7/4 + f_2 m_8/2 \\
& \quad + f_3 m_3/8 + f_3 m_4/8 + f_3 m_5/8 \\
& \quad + f_3 m_6/4 + f_3 m_7/4 + f_3 m_8/4 \\
& + f_4 m_3/4 + f_4 m_4/8 + f_4 m_6/2 + f_4 m_7/4 \\
& \quad + f_5 m_1/8 + f_5 m_2/4 + f_5 m_4/8 \\
& \quad + f_5 m_5/4 + f_5 m_7/8 + f_5 m_8/4 \\
& + f_6 m_1/8 + f_6 m_2/8 + f_6 m_3/8 + f_6 m_4/8 \\
& + f_6 m_5/8 + f_6 m_6/8 + f_6 m_7/8 + f_6 m_8/8 \\
& \quad + f_7 m_1/8 + f_7 m_3/4 + f_7 m_4/8 \\
& \quad + f_7 m_6/4 + f_7 m_7/8 \\
& + f_8 m_1/4 + f_8 m_2/2 + f_8 m_4/8 + f_8 m_5/4 \\
& \quad + f_9 m_1/4 + f_9 m_2/4 + f_9 m_3/8 \\
& \quad + f_9 m_4/8 + f_9 m_5/8 \\
& + f_{10} m_1/4 + f_{10} m_3/4 + f_{10} m_4/8
\end{aligned}$$

$X/Y^M; III^M/III^M;$   
 $IV/IV$

$m_5$

$$\begin{aligned}
& f_3 m_4/16 + f_3 m_5/8 + f_3 m_7/8 + f_3 m_8/4 \\
& + f_4 m_4/8 + f_4 m_5/4 + f_4 m_7/4 + f_4 m_8/2 \\
& \quad + f_6 m_1/16 + f_6 m_2/8 + f_6 m_4/16 \\
& \quad + f_6 m_5/8 + f_6 m_7/16 + f_6 m_8/8 \\
& \quad + f_7 m_1/8 + f_7 m_2/4 + f_7 m_4/8 \\
& \quad + f_7 m_5/4 + f_7 m_7/8 + f_7 m_8/4 \\
& + f_9 m_1/8 + f_9 m_2/4 + f_9 m_4/16 + f_9 m_5/8 \\
& + f_{10} m_1/4 + f_{10} m_2/2 + f_{10} m_4/8 + f_{10} m_5/4
\end{aligned}$$

$Y^M/Y^M; III/III; IV/IV$

$m_6$

$$\begin{aligned}
& f_5 m_3/8 + f_5 m_4/16 + f_5 m_6/4 + f_5 m_7/8 \\
& + f_6 m_3/16 + f_6 m_4/32 + f_6 m_6/8 + f_6 m_7/16 \\
& + f_8 m_3/4 + f_8 m_4/8 + f_8 m_6/2 + f_8 m_7/4 \\
& + f_9 m_3/8 + f_9 m_4/16 + f_9 m_6/4 + f_9 m_7/8
\end{aligned}$$

|                                    |       |                                                                                                                                                                                                                                                                                                                                                                                                                                       |
|------------------------------------|-------|---------------------------------------------------------------------------------------------------------------------------------------------------------------------------------------------------------------------------------------------------------------------------------------------------------------------------------------------------------------------------------------------------------------------------------------|
| $Y^M/Y^M; III/III^M;$<br>$IV/IV$   | $m_7$ | $ \begin{aligned} & f_5 m_4/16 + f_5 m_5/8 + f_5 m_7/8 + f_5 m_8/4 \\ & + f_6 m_3/16 + f_6 m_4/16 + f_6 m_5/16 \\ & + f_6 m_6/8 + f_6 m_7/8 + f_6 m_8/8 \\ & + f_7 m_3/8 + f_7 m_4/16 + f_7 m_6/4 + f_7 m_7/8 \\ & + f_8 m_4/8 + f_8 m_5/4 + f_8 m_7/4 + f_8 m_8/2 \\ & + f_9 m_3/8 + f_9 m_4/8 + f_9 m_5/8 \\ & + f_9 m_6/4 + f_9 m_7/4 + f_9 m_8/4 \\ & + f_{10} m_3/4 + f_{10} m_4/8 + f_{10} m_6/2 + f_{10} m_7/4 \end{aligned} $ |
| $Y^M/Y^M; III^M/III^M;$<br>$IV/IV$ | $m_8$ | $ \begin{aligned} & f_6 m_4/32 + f_6 m_5/16 + f_6 m_7/16 + f_6 m_8/8 \\ & + f_7 m_4/16 + f_7 m_5/8 + f_7 m_7/8 + f_7 m_8/4 \\ & + f_9 m_4/16 + f_9 m_5/8 + f_9 m_7/8 + f_9 m_8/4 \\ & + f_{10} m_4/8 + f_{10} m_5/4 + f_{10} m_7/4 + f_{10} m_8/2 \end{aligned} $                                                                                                                                                                     |

---
